# Supplementary material for: National Estimates of Gender-Affirming Surgery in the US
Source: PubMed Central journal article supplement (PMC10448302; doi:10.1001/jamanetworkopen.2023.30348), 2023-08-23

## Supplemental Online Content

Wright JD, Chen L, Suzuki Y, Matsuo K, Hershman DL. National estimates of gender affirming surgery in the US. *JAMA Netw Open*. 2023;6(8):e2330348. doi:10.1001/jamanetworkopen.2023.30348

**eTable.** *ICD-10* and *CPT* Codes of Gender-Affirming Surgery

**eFigure.** eFigure. Percentage of Patients With Codes for Gender Identity Disorder Who Underwent GAS

This supplemental material has been provided by the authors to give readers additional information about their work.

**eTable. ICD-10 and CPT Codes of Gender-Affirming Surgery**

|                                        | <b>CPT</b>                                                                                                                                                                                                                        | <b>ICD-10</b>                                        |
|----------------------------------------|-----------------------------------------------------------------------------------------------------------------------------------------------------------------------------------------------------------------------------------|------------------------------------------------------|
| <b>Breast or chest surgery</b>         |                                                                                                                                                                                                                                   |                                                      |
| Breast reconstruction                  | 19303, 19304;                                                                                                                                                                                                                     | 0HTV0ZZ;                                             |
| Mammoplasty                            | 19325;                                                                                                                                                                                                                            | 0H0V*, 0HRV*, 0HHV0NZ, 0HHV3NZ,<br>0HHV7NZ, 0HHV8NZ; |
| Mastopexy or nipple reconstruction     | 19316, 19350;                                                                                                                                                                                                                     | 0HQV*, 0HSV0*, 0HSW*, 0HSX*;                         |
| <b>Genital surgery</b>                 |                                                                                                                                                                                                                                   |                                                      |
| Orchitectomy                           | 54520, 54690;                                                                                                                                                                                                                     | 0VTC*;                                               |
| Prostatectomy                          | 55840, 55866;                                                                                                                                                                                                                     | 0VT0*;                                               |
| Penectomy                              | 54125;                                                                                                                                                                                                                            | 0VTS*;                                               |
| Vaginoplasty                           | 57291, 57292, 57295, 57296, 57335, 57426;                                                                                                                                                                                         | 0W4M*;                                               |
| Clitoroplasty or labiaplasty           | 55970, 56800, 56805;                                                                                                                                                                                                              | 0W0M*;                                               |
| Hysterectomy                           | 58150, 58152, 58180, 58200, 58950, 58951, 58956, 58260, 58262,<br>58263, 58267, 58270, 58275, 58280, 58290, 58291, 58292, 58293,<br>58294, 58541, 58542, 58543, 58544, 58550, 58552, 58553, 58554,<br>58570, 58571, 58572, 58573; | 0UT90*;<br>0UT97*; 0UT94*, 0UT98*, 0UT9F*;           |
| Salpingo-oophorectomy                  | 58720, 58940, 58943, 58661;                                                                                                                                                                                                       | 0UT2*, 0UT7*;                                        |
| Vaginectomy                            | 57106, 57110;                                                                                                                                                                                                                     | 0UTG*;                                               |
| Vulvectomy                             | 56625;                                                                                                                                                                                                                            | 0UTM*;                                               |
| Metoidioplasty or phalloplasty         | 55899, 55980;                                                                                                                                                                                                                     | 0W4N*;                                               |
| Urethroplasty                          | 53420, 53425, 53430;                                                                                                                                                                                                              | 0TQD*, 0TRD*, 0TUD*;                                 |
| Scrotoplasty                           | 55175, 55180;                                                                                                                                                                                                                     |                                                      |
| Testicular prostheses                  | 54660;                                                                                                                                                                                                                            | 0VRC0JZ;                                             |
| <b>Other cosmetic procedures</b>       |                                                                                                                                                                                                                                   |                                                      |
| Rhinoplasty                            | 30400, 30410, 30420, 30430, 30435, 30450;                                                                                                                                                                                         | 090K*,<br>09RK*,<br>09UK*;                           |
| Rhytidectomy                           | 15824, 15825, 15826, 15828, 15829;                                                                                                                                                                                                | 0J01*,<br>0W02*, 0WU2*;                              |
| Blepharoplasty                         | 15820, 15821, 15822, 15823;                                                                                                                                                                                                       | 080N*, 080P*, 080Q*, 080R*;                          |
| Hair removal or hair transplantation   | 15775, 15776, 17380;                                                                                                                                                                                                              | 0HRS*;                                               |
| Facial feminizing or chin augmentation | 21120, 21121, 21122, 21123, 21125, 21127, 21208, 21209;                                                                                                                                                                           | 0NRT*, 0NRV*, 0NUT*, 0NUV*,<br>0W04*, 0W05*;         |
| Liposuction                            | 15830, 15832, 15833, 15834, 15835, 15836, 15837, 15838, 15839,<br>15876, 15877, 15878, 15879;                                                                                                                                     |                                                      |
| Collagen injections                    | 11950, 11951, 11952, 11954;                                                                                                                                                                                                       |                                                      |

---

|                                                      |                                                                |                      |
|------------------------------------------------------|----------------------------------------------------------------|----------------------|
| Trachea shave or reduction, thyroid<br>chondroplasty | 31599, 31899;                                                  | 0BQ1*, 0CRS*, 0CUS*; |
| Other                                                | 14021, 14060, 15769, 15770, 15771, 15772, 15773, 15774, 15775; |                      |

---

**eFigure.** Percentage of Patients With Codes for Gender Identity Disorder Who Underwent GAS

Shown overall, for inpatient admissions and for ambulatory surgery encounters. Error bars represent 95% confidence intervals.

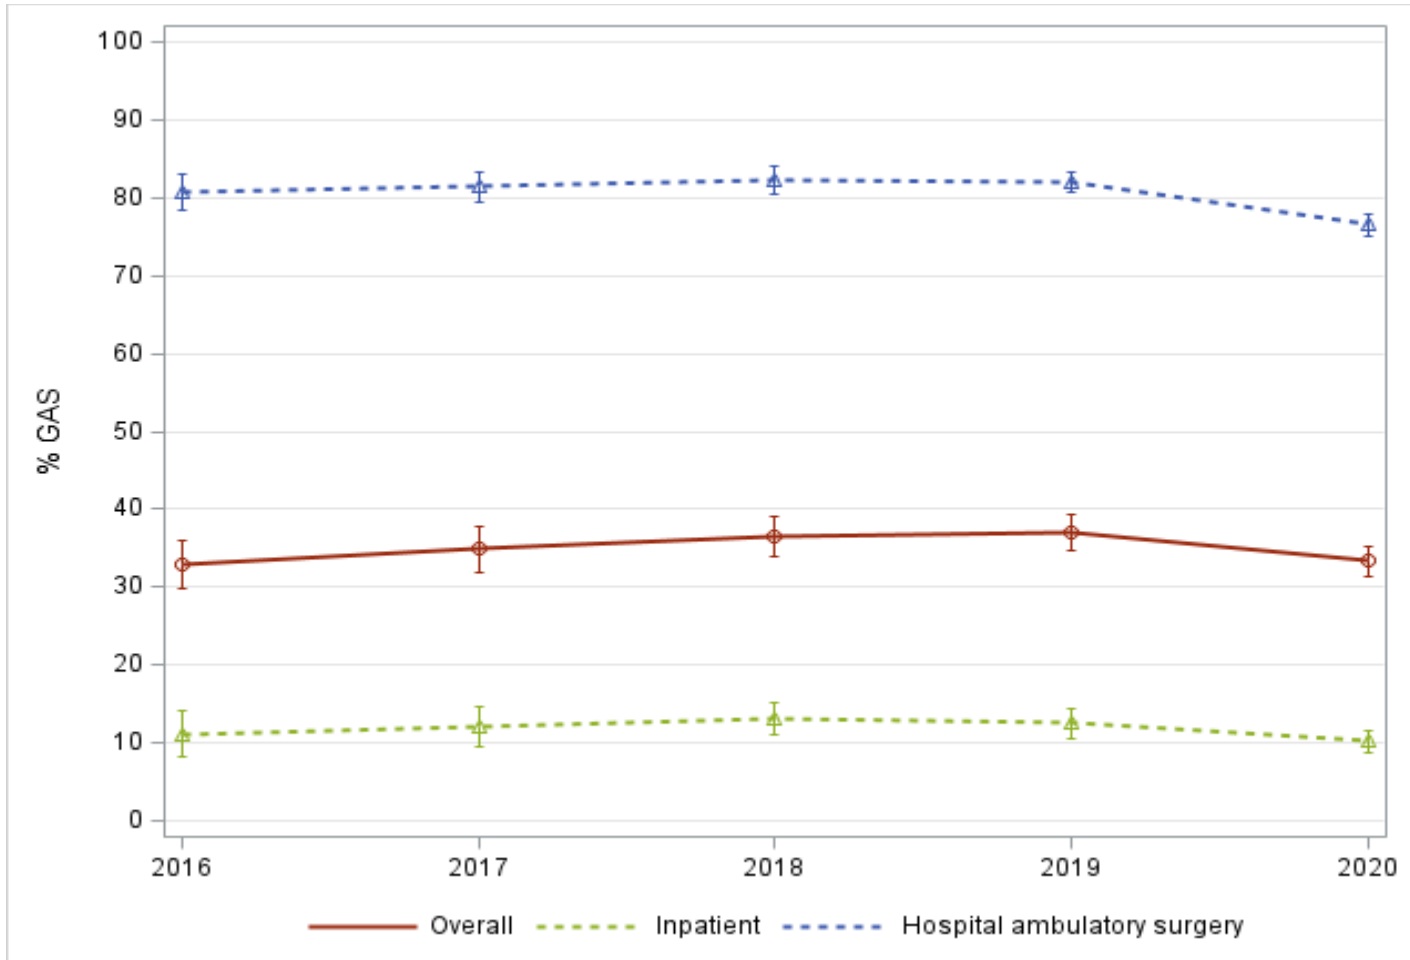

Supplement: jamanetwopen-e2330348-s001.pdf [file jamanetwopen-e2330348-s001.pdf]
