# Supplementary material for: National Estimates of Gender-Affirming Surgery in the US
Source: PubMed Central journal article supplement (PMC10448302; doi:10.1001/jamanetworkopen.2023.30348), 2023-08-23
Supplement: jamanetwopen-e2330348-s002.pdf [file jamanetwopen-e2330348-s002.pdf]

## Data Sharing Statement

Wright. National Estimates of Gender-Affirming Surgery in the US. *JAMA Netw Open*.  
Published August 23, 2023. doi:10.1001/jamanetworkopen.2023.30348

### Data

**Data available:** No

### Additional Information

**Explanation for why data not available:** Data publicly available for investigators
